# Supplementary material for: NeurEx: digitalized neurological examination offers a novel high‐resolution disability scale
Source: PubMed Central journal article supplement — Ann Clin Transl Neurol. 2018 Sep 24;5(10):1241–9. doi: 10.1002/acn3.640 (PMC6186944; doi:10.1002/acn3.640), 2018-09-24
Supplement: ACN3-5-1241-s001.pdf [file ACN3-5-1241-s001.pdf]

# SUPPLEMENTARY MATERIAL

for

## NeurEx: digitalized neurological examination offers a novel high-resolution disability scale

Peter Kosa, PhD<sup>1</sup>, Christopher Barbour, MSc<sup>1,2</sup>, Alison Wichman, MD<sup>1</sup>, Mary Sandford, MSN<sup>1</sup>, Mark Greenwood, PhD<sup>2</sup>, and Bibiana Bielekova, MD<sup>1\*</sup>

### *Fine-tuning of the rules for translating NeurEx into the four clinical scales.*

We fine-tuned feature mapping and scale computation in the NeurEx algorithms to minimize differences between clinician-graded and App-computed disability scores. For example, SNRS rating for the motor examination of upper extremities as “normal, mild, moderate, and severe” was first mapped to upper extremities strength in the NeurEx App (i.e., NeurEx Panel 8 in Fig. S1). The SNRS rating “normal” was assigned a NeurEx strength rating 0 (i.e., no detectable weakness). To achieve a starting position for codification of SNRS ratings “mild, moderate, and severe” we divided the theoretical maximum of NeurEx strength rating for upper extremities (i.e., 50) equally between the remaining three semi-quantitative SNRS options: (i.e., SNRS “mild” deficit = NeurEx subscore 1-17, “moderate” deficit = 18-34, and “severe” deficit = 35-50). These cut-offs were adjusted in the iterative process when pilot data demonstrated that the NeurEx App consistently under- or overestimate disability in comparison to clinician’s ratings. In the results section, we compared differences between clinician- and NeurEx App-based disability scores using the algorithm that emerged from such iterative optimization.

**Figure S1:** 18 panels of the NeurEx App specifying the number of features, maximum score and % of total NeurEx score for each panel.

**Figure S2:** Bland-Altman plots for retrospectively (Clinician #1 vs Clinician #2) (**A**) and prospectively (App vs Clinician) (**B**) assigned values of EDSS, SNRS, AI, and IPEC. The y-axis displays the differences between measurement pairs and the x-axis displays the average values of measurement pairs. The dashed-grey line represents the mean of the measurement differences, while the dashed-red line represents the mean difference plus/minus two standard deviations of the differences. The individual points have been slightly jittered to avoid over-plotting.

**Table S1:** Demographic data

**Video S1:** An example of NeurEx App grading of a real-MS patient

# Figure S1

## Panel 1: Cognitive functions

# features: **32**

Max score: **120**

% of NeurEx: **8.9**

Select signs/complaints/dysfunctions first, then assigned the dysfunction rating:

### Pathological signs & complaints:

- Glabella
- Sucking reflex
- Grasp reflex
- Palmomentary reflex
- Gegenhalten
- Inappropriate affect
- Dysinhibition
- Problems with concentrating
- Problems with learning new material
- Difficulties with multitasking

**R**

**L**

- Problems with motor sequences
- Poor response inhibition on Go-no Go test

- Problems with motor sequences
- Poor response inhibition on Go-no Go test

### Dysfunction rating

No pathological signs

- Mild
- Moderate
- Severe

### Specific dysfunctions:

- Alexia (problems with reading)
- Agraphia (problems with writing)
- Abulia
- Acalculia
- Amnesia
- Broca's Aphasia
- Wernicke's Aphasia
- Anomic Aphasia
- Global Aphasia
- Ideomotor Apraxia
- Constructional Apraxia
- Spatial disorientation
- Temporal disorientation
- Corpus Callosum dysfunction

### Dysfunction rating

No specific dysfunctions

- Mild
- Moderate
- Severe

- Cognitive fatigue
- Drowsiness
- Stupor
- Coma

# Panel 2: Eyes

# features: 14

Max score: 30

% of NeurEx: 2.2

## Pupils:

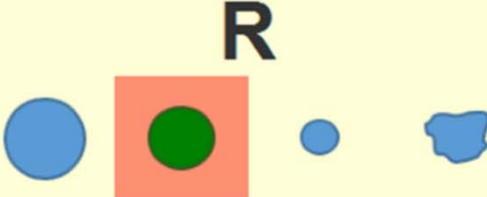

|                                   |              |
|-----------------------------------|--------------|
| Reactive to direct light          | Non-reactive |
| Reactive to contralateral light   | Non-reactive |
| Reactive to accomodation          | Non-reactive |
| Afferent pupillary defect present |              |

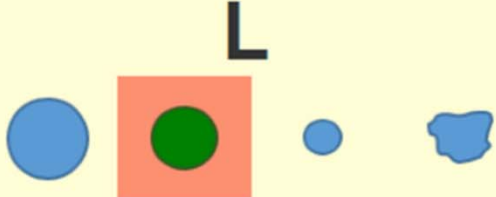

|                                   |              |
|-----------------------------------|--------------|
| Reactive to direct light          | Non-reactive |
| Reactive to contralateral light   | Non-reactive |
| Reactive to accomodation          | Non-reactive |
| Afferent pupillary defect present |              |

## Vision:

*Vision should be corrected with patient's glasses; please, indicate below:*

- Corrected
- Uncorrected

**R**

|                                |
|--------------------------------|
| 20/20                          |
| 20/25                          |
| 20/30                          |
| 20/40                          |
| 20/50                          |
| 20/70                          |
| 20/100                         |
| 20/200                         |
| 20/400                         |
| 20/800                         |
| Red color desaturation present |

**L**

|                                |
|--------------------------------|
| 20/20                          |
| 20/25                          |
| 20/30                          |
| 20/40                          |
| 20/50                          |
| 20/70                          |
| 20/100                         |
| 20/200                         |
| 20/400                         |
| 20/800                         |
| Red color desaturation present |

# Panel 3: Eye movements

# features: 20

Max score: 30

% of NeurEx: 2.2

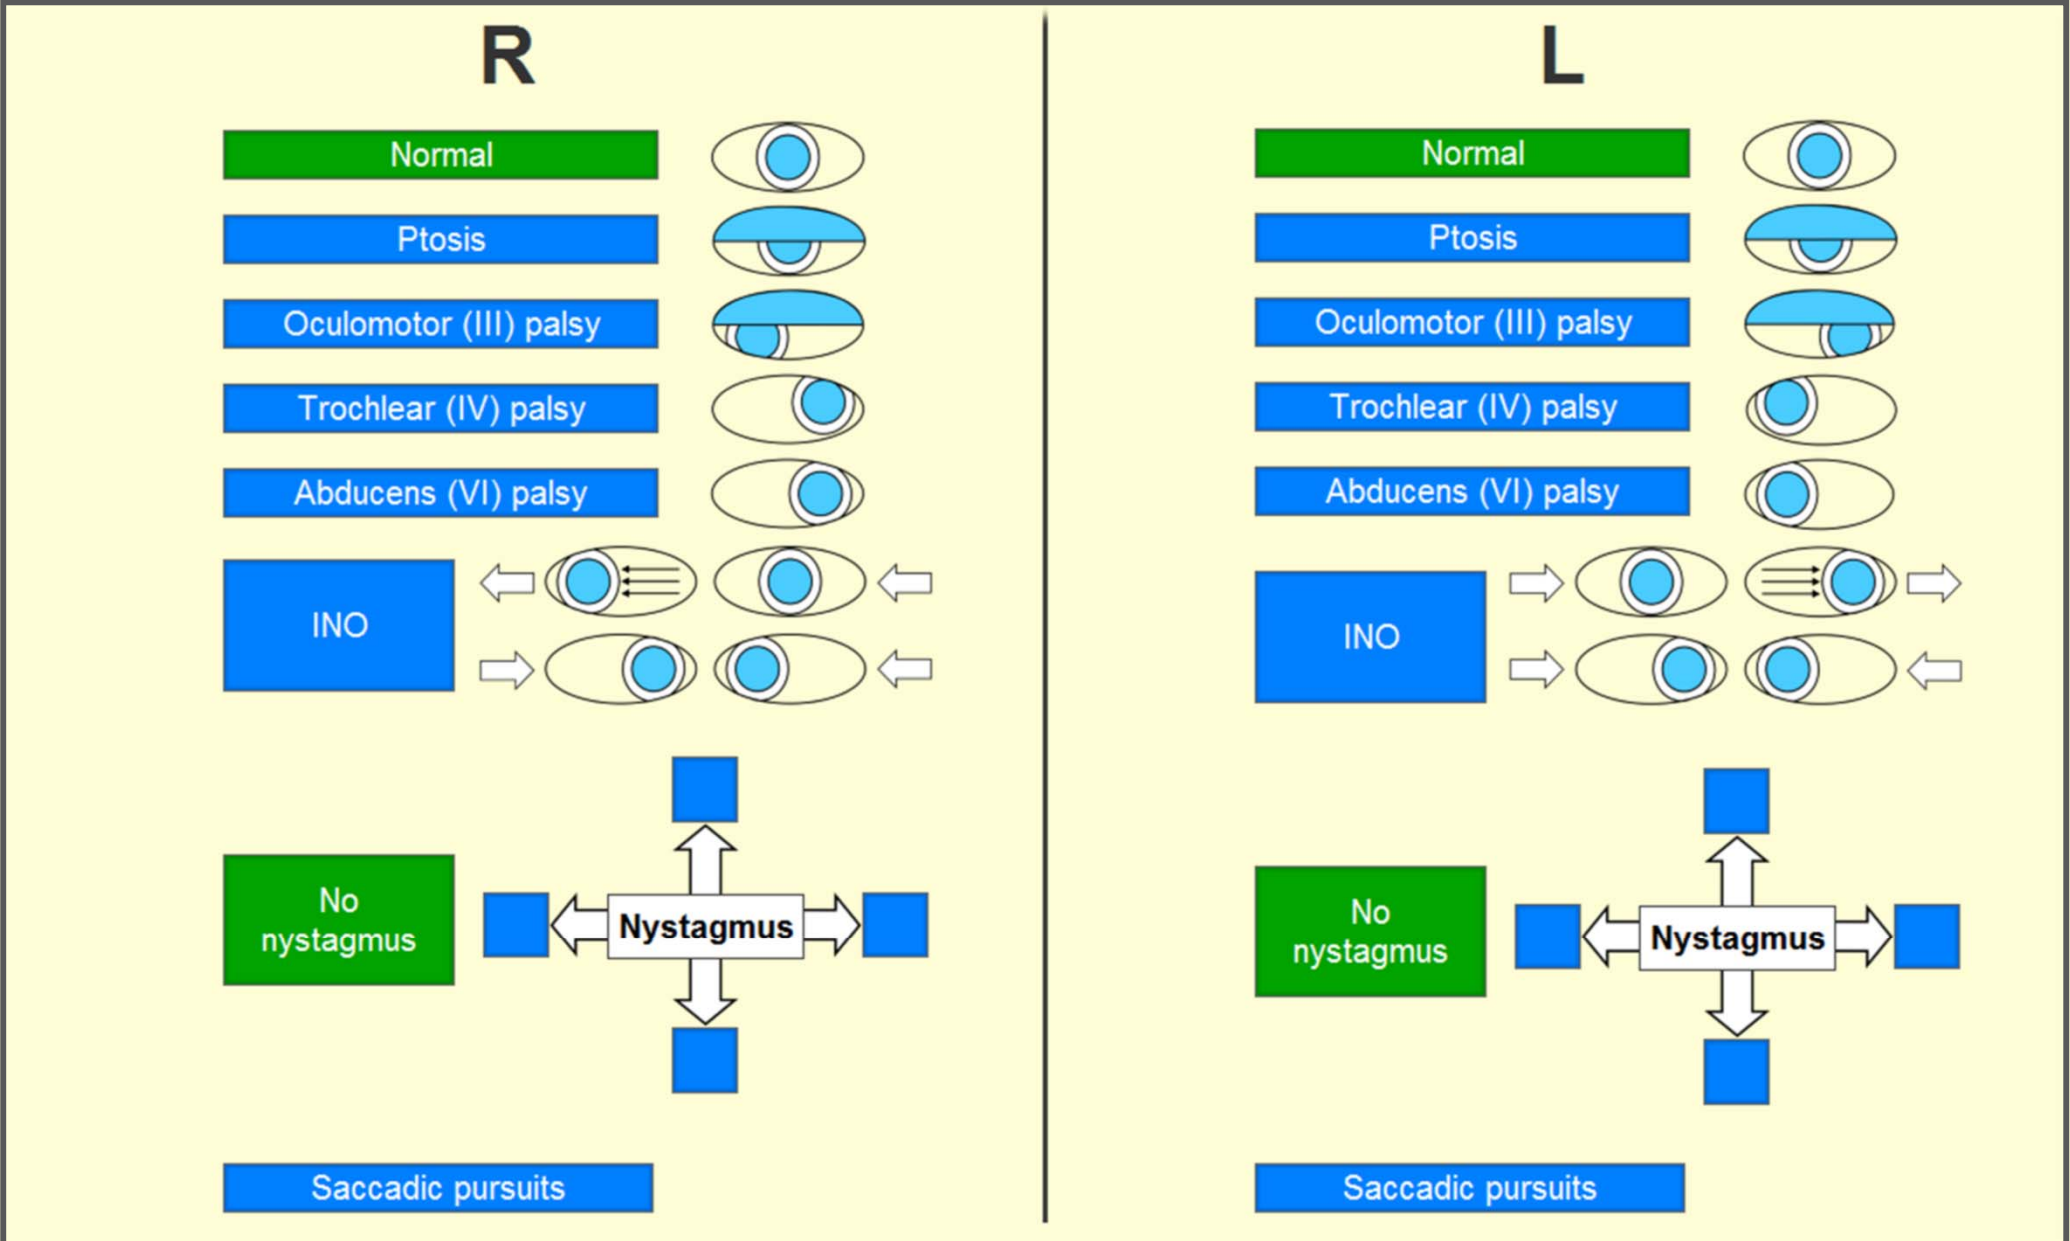

# Panel 4: Visual fields

# features: 12

Max score: 24

% of NeurEx: 1.8

## R

- Normal
- Small scotoma
- Large scotoma

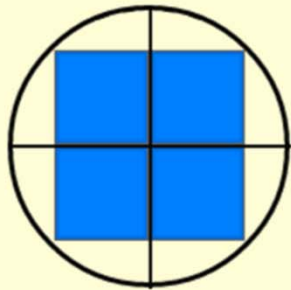

## L

- Normal
- Small scotoma
- Large scotoma

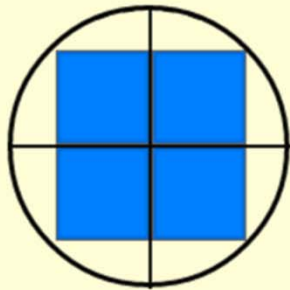

Note:

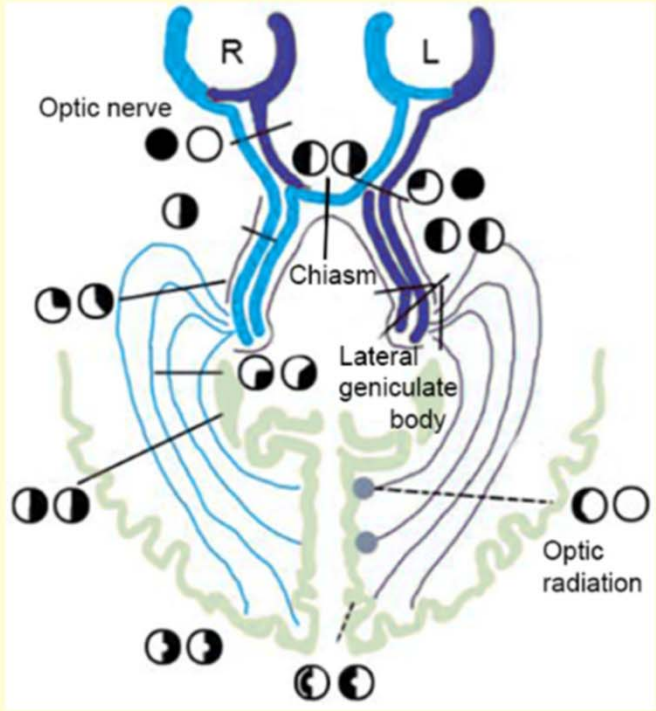

Fundi:

## R

- Normal
- Mild atrophy
- Severe atrophy

Note:

## L

- Normal
- Mild atrophy
- Severe atrophy

Note:



# Panel 5: Brainstem/Remaining cranial nerves

# features: 45

Max score: 38

% of NeurEx: 2.8

I. Olfactory:

- Normal smell
- Mild anosmia
- Severe anosmia

V. Trigeminal:

- Normal light touch sensation
- Abnormal light touch sensation
  - Mild
  - Moderate
  - Severe
- Normal pin prick sensation
- Abnormal pin prick sensation
  - Mild
  - Moderate
  - Severe

Select location first, then assigned the dysfunction rating:

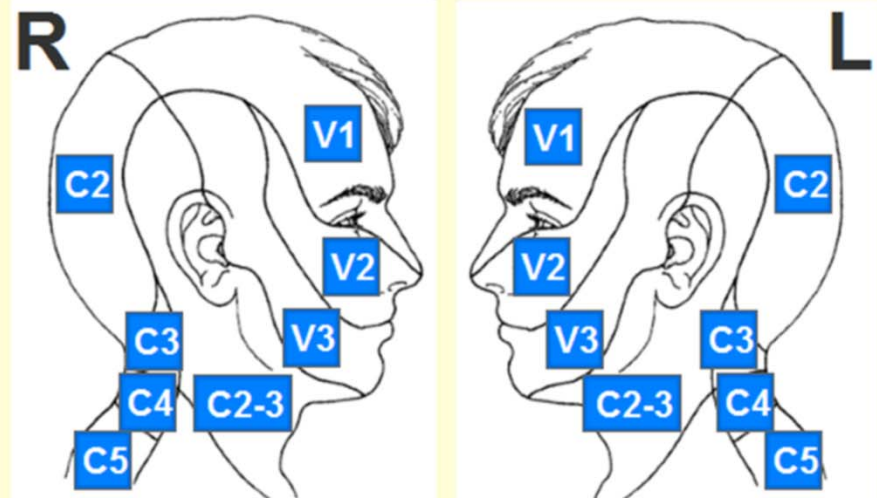

VII. Facial:

- |                                            | R                                               | L                                               |
|--------------------------------------------|-------------------------------------------------|-------------------------------------------------|
| <input checked="" type="checkbox"/> Normal | <input type="checkbox"/> Paralysis - Upper      | <input type="checkbox"/> Paralysis - Upper      |
|                                            | <input type="checkbox"/> Loss of corneal reflex | <input type="checkbox"/> Loss of corneal reflex |
|                                            | <input type="checkbox"/> Xerophthalmia          | <input type="checkbox"/> Xerophthalmia          |
|                                            | <input type="checkbox"/> Paralysis - Lower      | <input type="checkbox"/> Paralysis - Lower      |
|                                            | <input type="checkbox"/> Loss of taste          | <input type="checkbox"/> Loss of taste          |
|                                            | <input type="checkbox"/> Hyperacusis            | <input type="checkbox"/> Hyperacusis            |

# Panel 6: Brainstem/Lower cranial nerves

# features: **23**

Max score: **24**

% of NeurEx: **1.8**

|                           |        | <b>R</b>                                                                                                                    | <b>L</b>                                                         |
|---------------------------|--------|-----------------------------------------------------------------------------------------------------------------------------|------------------------------------------------------------------|
| VIII. Vestibulo-Cochlear: | Normal | Decreased hearing<br>Tinnitus or Weber/Rinne Abnormality                                                                    | Decreased hearing<br>Tinnitus or Weber/Rinne Abnormality         |
|                           |        | Vertigo                                                                                                                     |                                                                  |
| IX. Glosso-Pharyngeal:    | Normal | Swallowing difficulties - liquids<br>Loss of gag reflex<br>Swallowing difficulties - solids<br>Loss of carotid sinus reflex |                                                                  |
| X. Vagus:                 | Normal | Dysphonia<br>Loss of cough reflex<br>Dysarthria (palatal)<br>Dysautonomia                                                   |                                                                  |
|                           |        | <b>R</b>                                                                                                                    | <b>L</b>                                                         |
| XI. Spinal accessory:     | Normal | Sternocleidomastoid palsy<br>Trapezius (shoulder) palsy                                                                     | Sternocleidomastoid palsy<br>Trapezius (shoulder) palsy          |
|                           |        | <b>R</b>                                                                                                                    | <b>L</b>                                                         |
| XII. Hypoglossal:         | Normal | Tongue deviation to R<br>Tongue atrophy<br>Tongue fasciculations                                                            | Tongue deviation to L<br>Tongue atrophy<br>Tongue fasciculations |

# Panel 7: Motor exam: Pyramidal signs & Motor fatigue

# features: 14

Max score: 28

% of NeurEx: 2.1

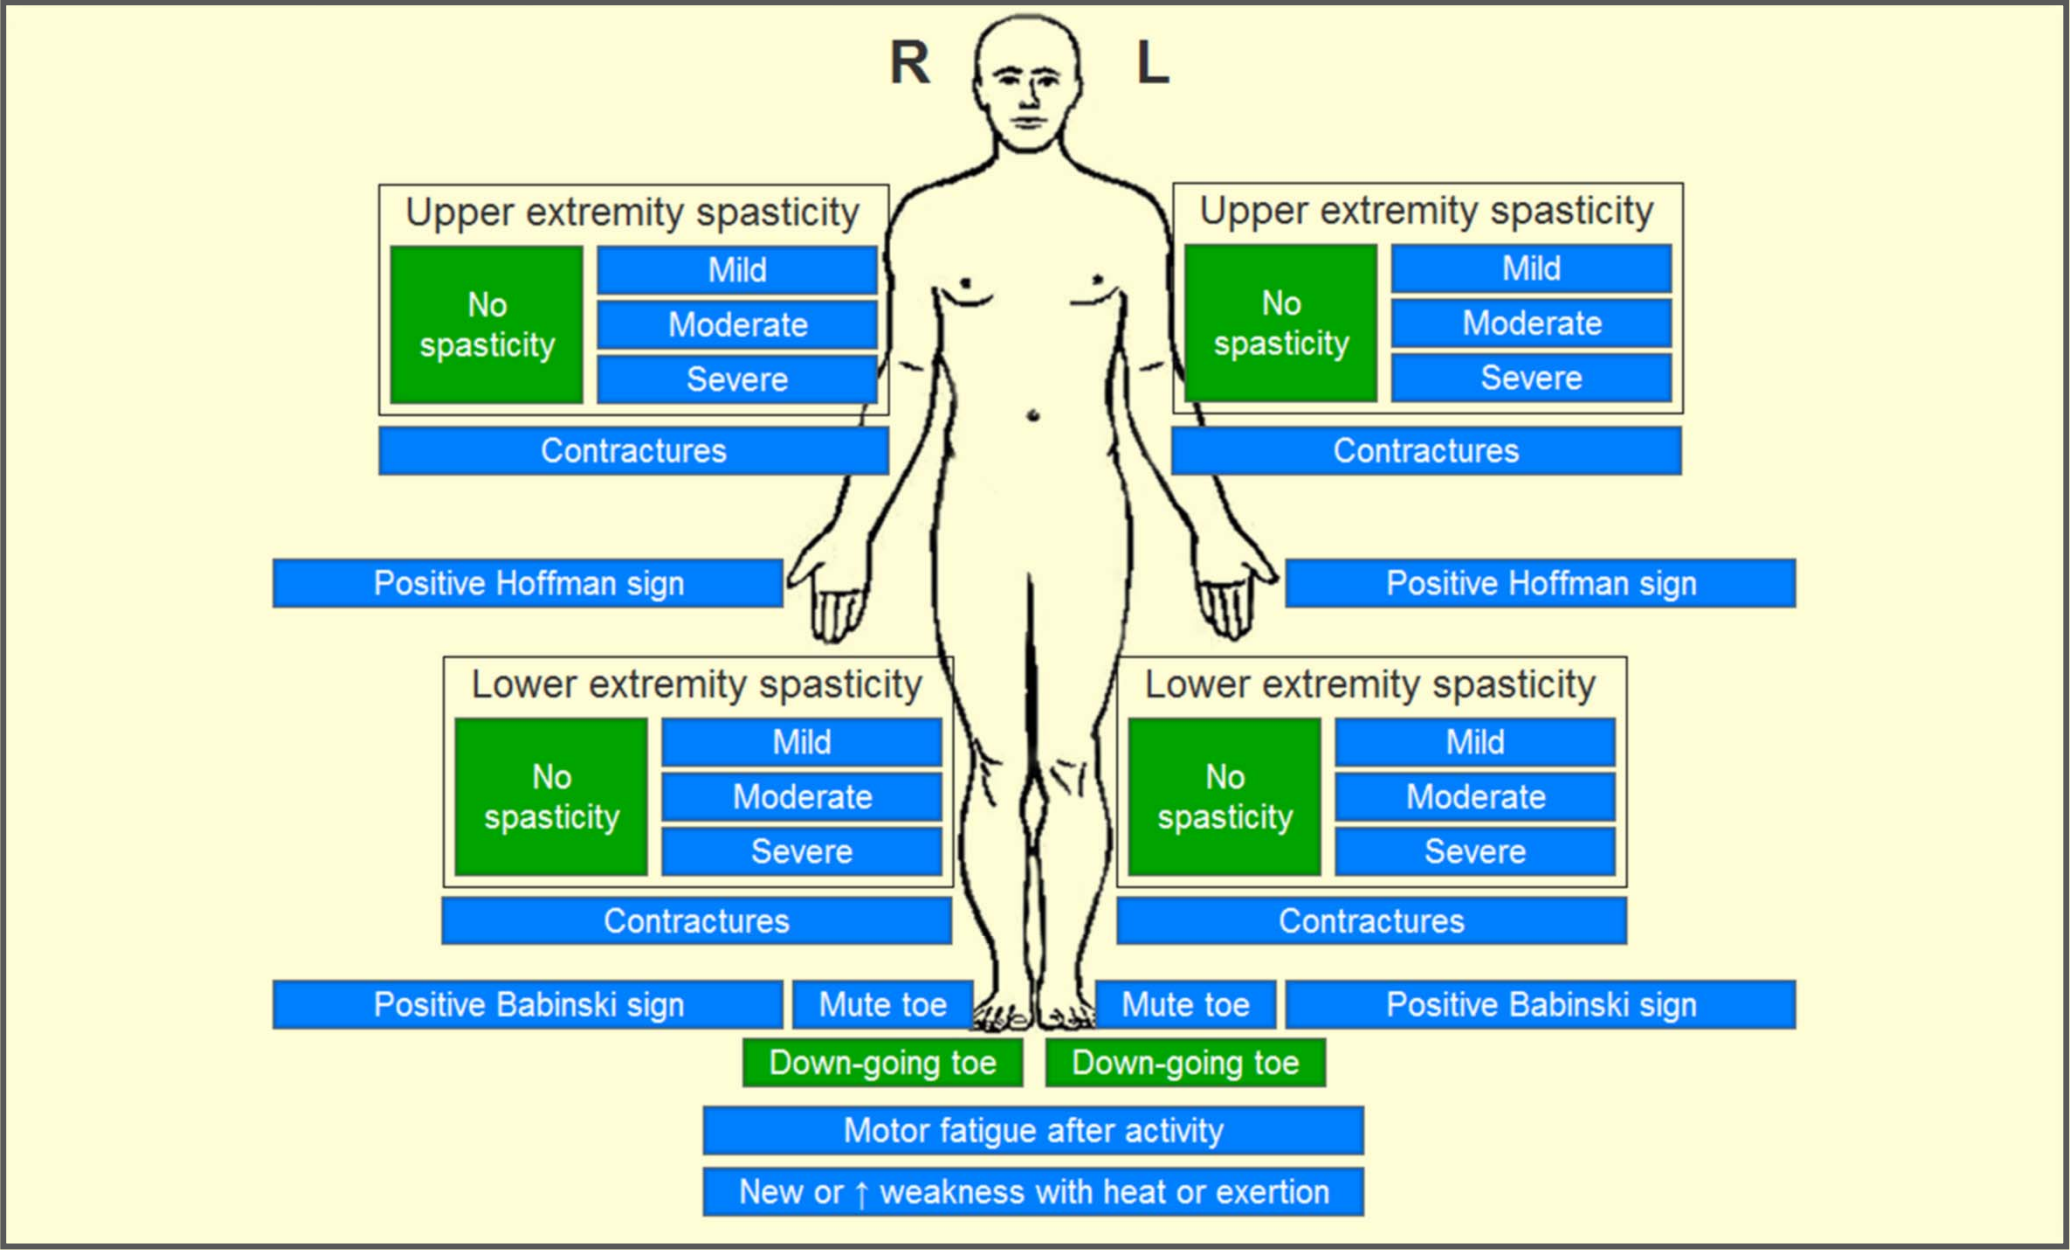



# Panel 8: Motor exam: Pyramidal signs & Motor fatigue

# features: **16**

Max score: **100**

% of NeurEx: **7.4**

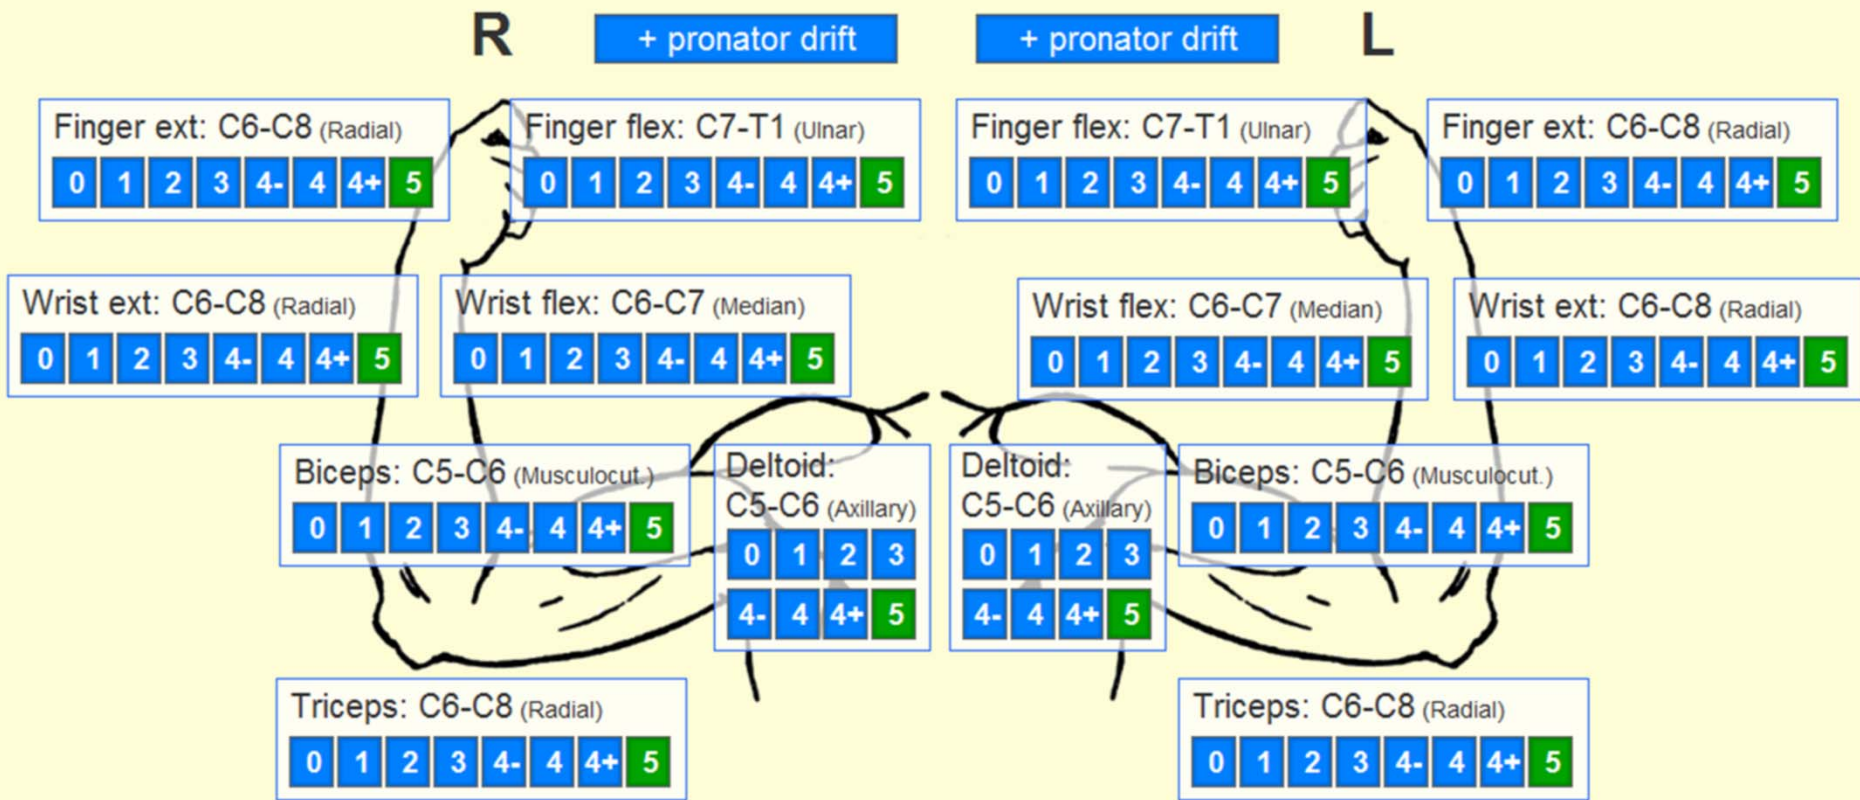

**Rating of strength:**

|                                               |                                                     |                                              |
|-----------------------------------------------|-----------------------------------------------------|----------------------------------------------|
| <b>0</b> No movement/no contraction           | <b>3</b> Movement against gravity but no resistance | <b>4+</b> Strong movement against resistance |
| <b>1</b> No movement/+contraction             | <b>4-</b> Mild movement against resistance          | <b>5</b> Normal strength                     |
| <b>2</b> Partial movement not against gravity | <b>4</b> Moderate movement against resistance       |                                              |

# Panel 9: Motor exam: Pyramidal signs & Motor fatigue

# features: 16

Max score: 112

% of NeurEx: 8.3

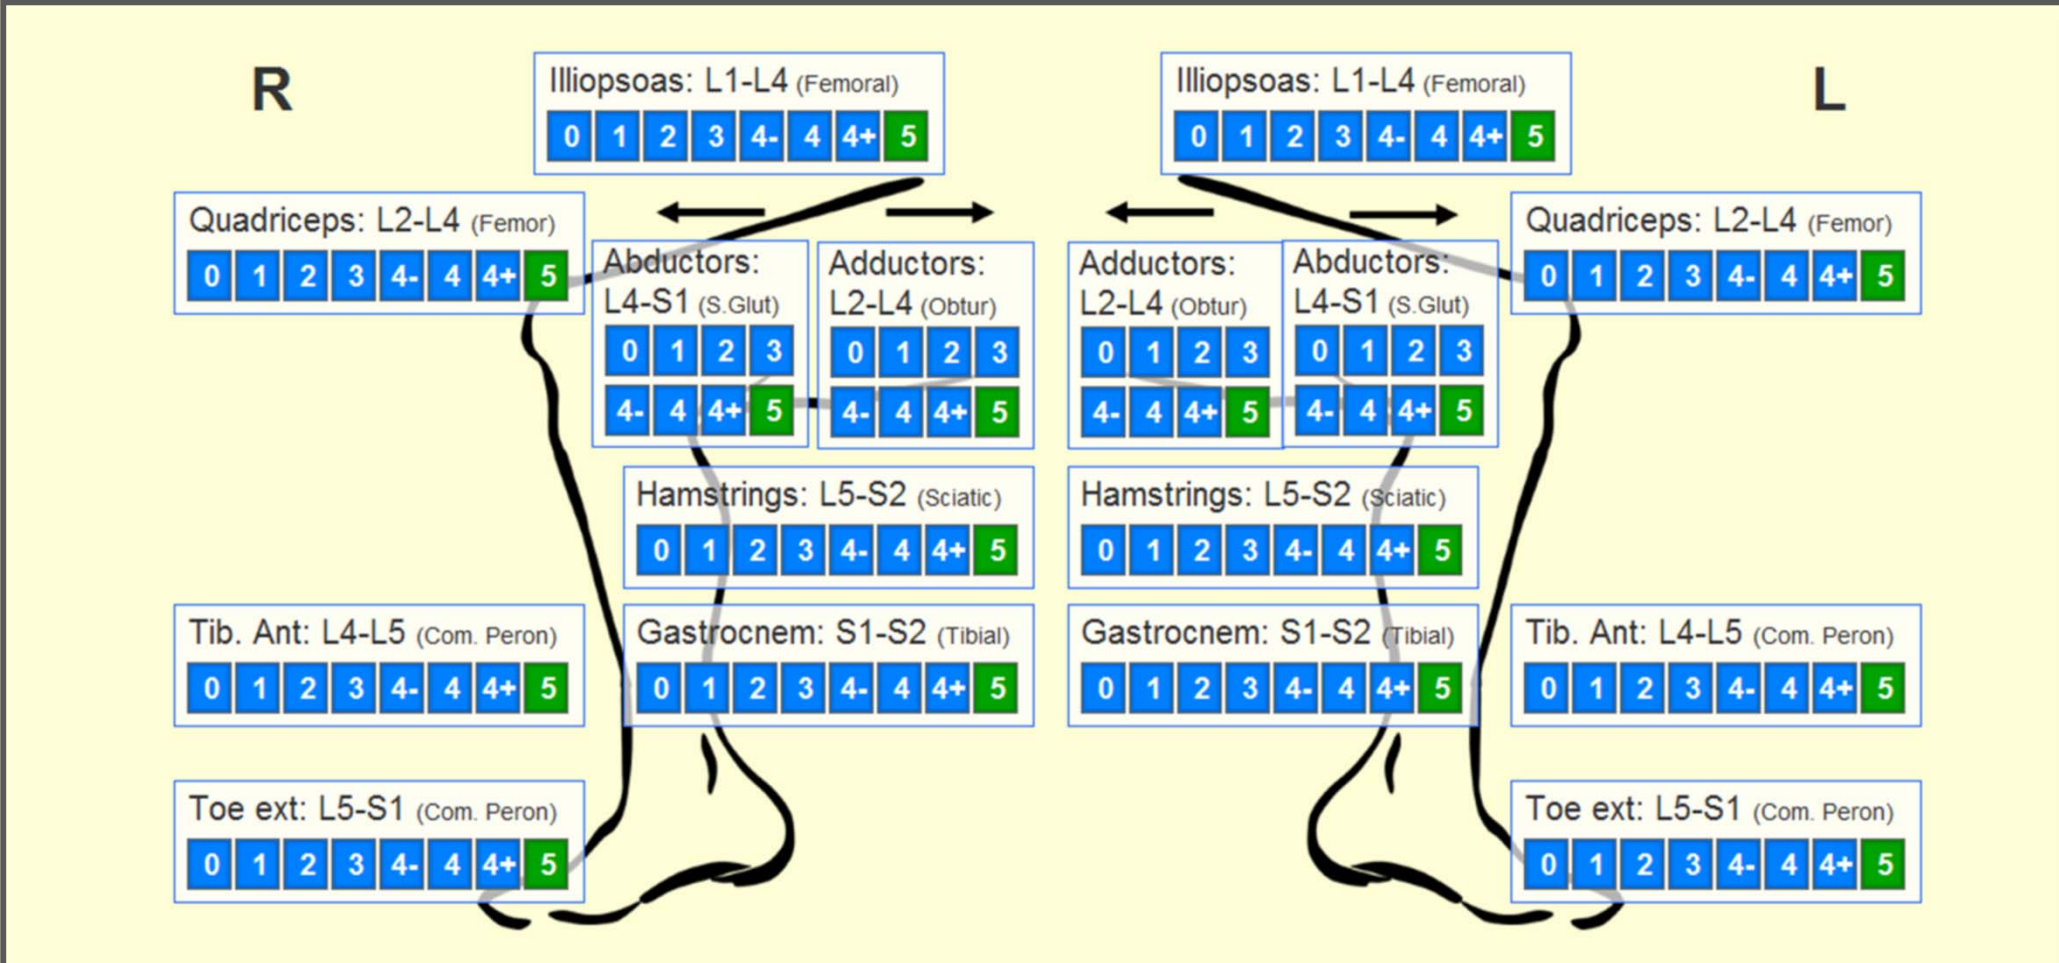

### Rating of strength:

- |                                               |                                                     |                                              |
|-----------------------------------------------|-----------------------------------------------------|----------------------------------------------|
| <b>0</b> No movement/no contraction           | <b>3</b> Movement against gravity but no resistance | <b>4+</b> Strong movement against resistance |
| <b>1</b> No movement/+contraction             | <b>4-</b> Mild movement against resistance          | <b>5</b> Normal strength                     |
| <b>2</b> Partial movement not against gravity | <b>4</b> Moderate movement against resistance       |                                              |

# Panel 10: Motor exam: Reflexes

# features: **22**

Max score: **41**

% of NeurEx: **3.0**

Rating of reflexes:

- 0 Absent
- 1 Decreased
- 2 Normal
- 3 Exaggerated
- 4 Un-sustained clonus
- 4+ Sustained clonus

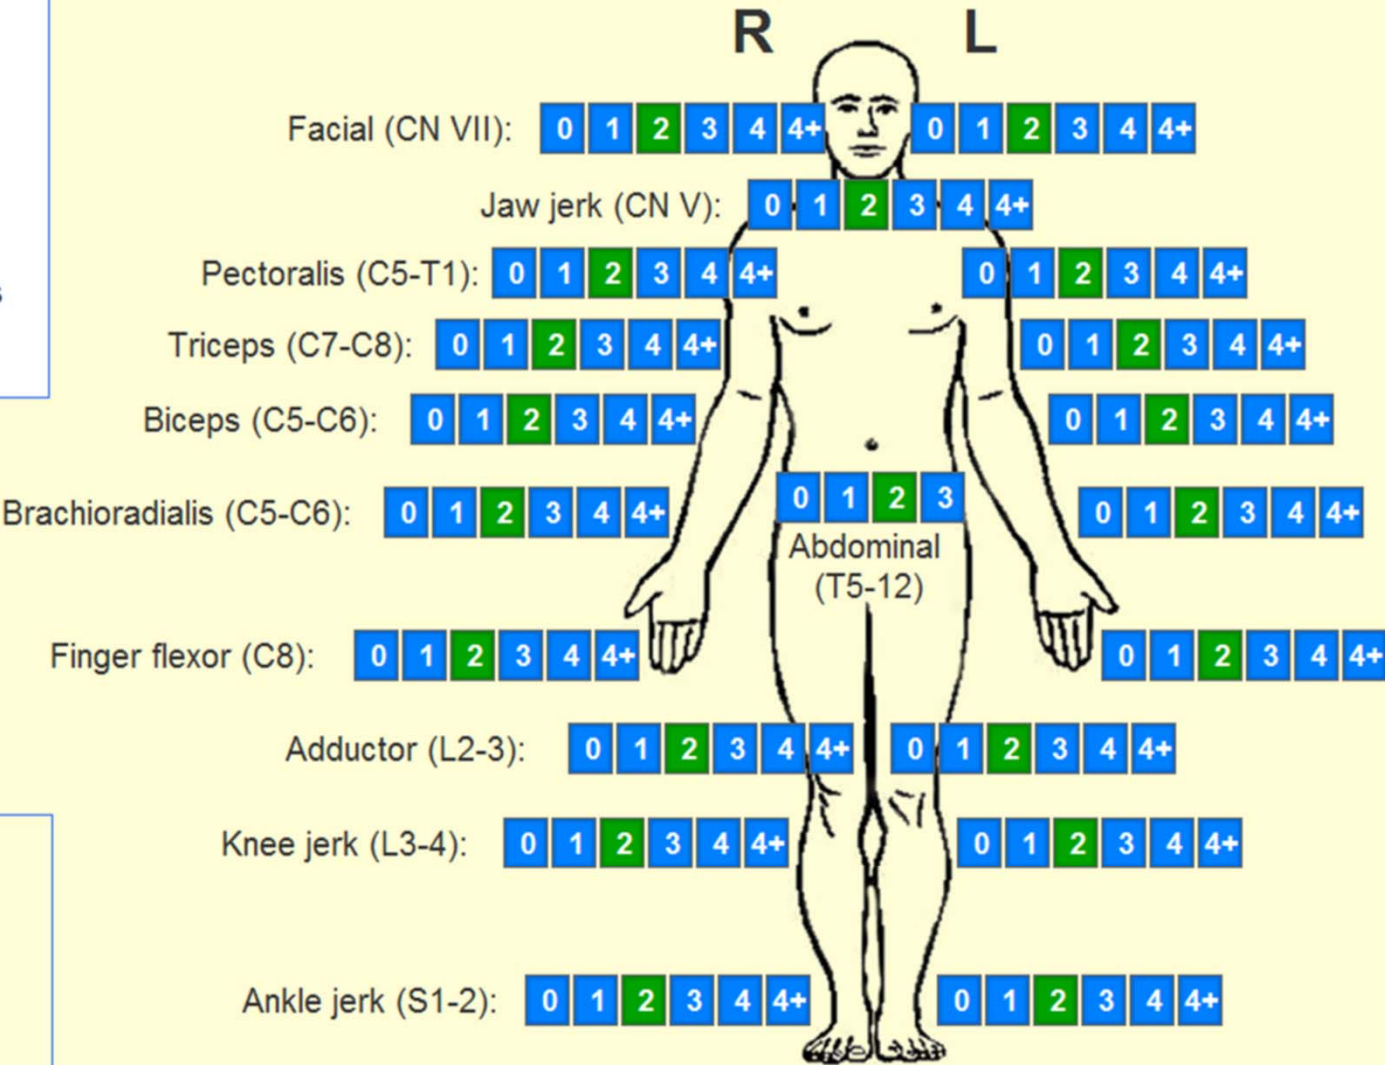

Non-routine reflexes:

Cremasteric (L1-2):

0 1 2 3

Anal (S3-4):

0 1 2 3



# Panel 11: Motor exam: Reflexes

# features: **24**

Max score: **72**

% of NeurEx: **4.0**

## Right Upper Extremity

|            |          |
|------------|----------|
| No atrophy | Mild     |
|            | Moderate |
|            | Severe   |

## Left Upper Extremity

|            |          |
|------------|----------|
| No atrophy | Mild     |
|            | Moderate |
|            | Severe   |

## Right Lower Extremity

|            |          |
|------------|----------|
| No atrophy | Mild     |
|            | Moderate |
|            | Severe   |

## Left Lower Extremity

|            |          |
|------------|----------|
| No atrophy | Mild     |
|            | Moderate |
|            | Severe   |

Select location first, then assigned the dysfunction rating:

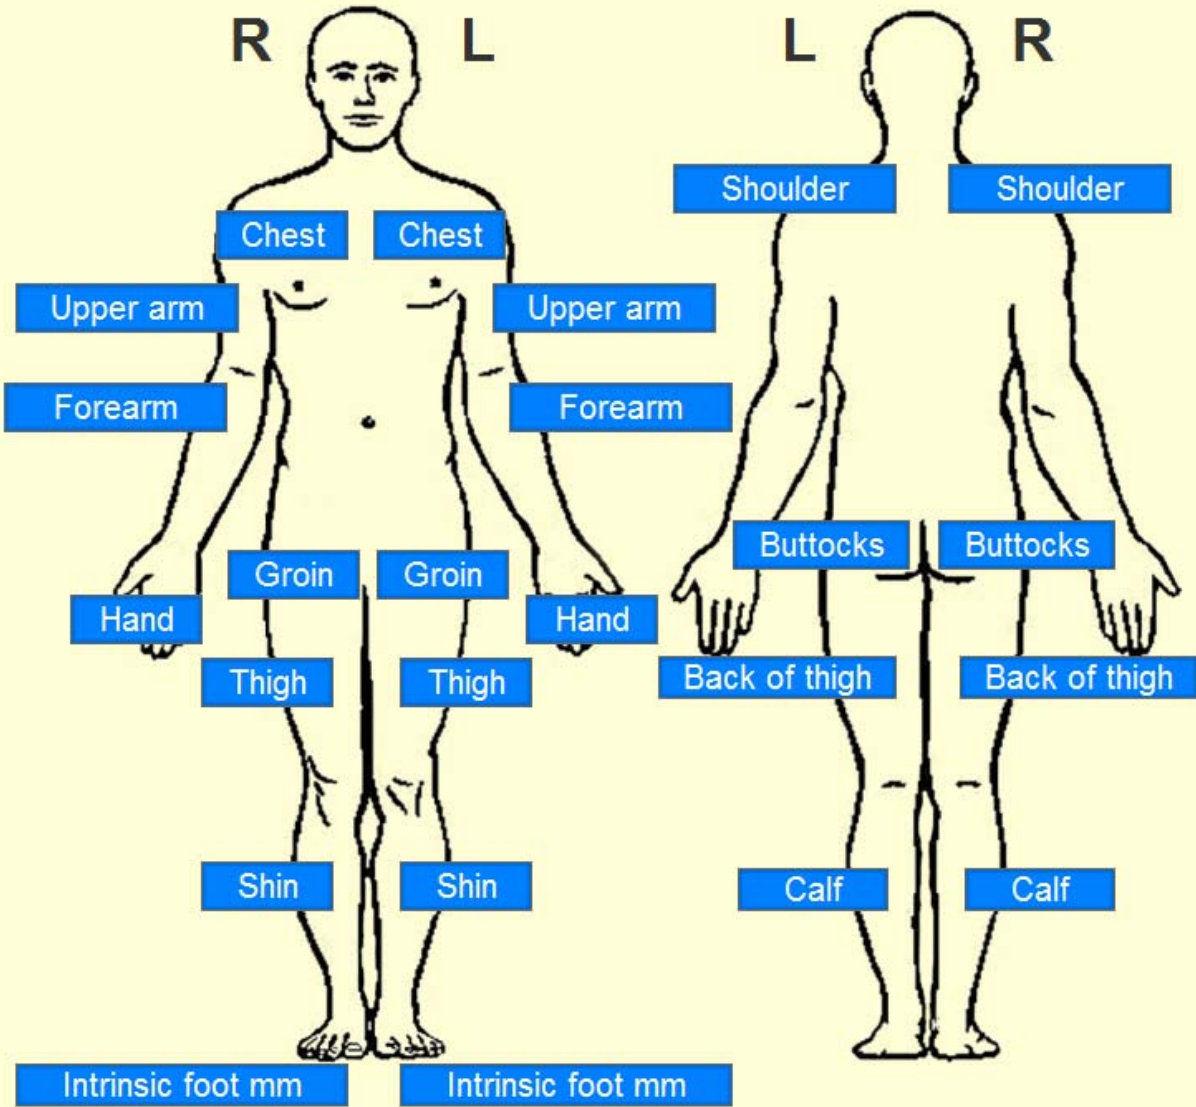

# Panel 12: Motor exam: Reflexes

# features: 20

Max score: 60

% of NeurEx: 4.4

For each limb select dysfunction(s) first, then assigned dysfunction rating:

*"Unable to test" on upper extremities will replicate scoring from the opposite limb. Please, make sure you grade the opposite limb before clicking "Unable to test".*

R L

Cerebellar speech

|                    |          |
|--------------------|----------|
| Ataxia             | Tremor   |
| Dysdiadochokinesis |          |
| Past-pointing      |          |
| Rebound            |          |
| Dysfunction rating |          |
| Normal             | Mild     |
|                    | Moderate |
|                    | Severe   |

Unable to test

|                    |          |
|--------------------|----------|
| Ataxia             | Tremor   |
| Dysdiadochokinesis |          |
| Past-pointing      |          |
| Rebound            |          |
| Dysfunction rating |          |
| Normal             | Mild     |
|                    | Moderate |
|                    | Severe   |

Unable to test

|                    |          |
|--------------------|----------|
| Ataxia             | Tremor   |
| Dysdiadochokinesis |          |
| Rebound            |          |
| Dysfunction rating |          |
| Normal             | Mild     |
|                    | Moderate |
|                    | Severe   |

Unable to test

|                    |          |
|--------------------|----------|
| Ataxia             | Tremor   |
| Dysdiadochokinesis |          |
| Rebound            |          |
| Dysfunction rating |          |
| Normal             | Mild     |
|                    | Moderate |
|                    | Severe   |

Unable to test

Truncal ataxia with open eyes

*"Unable to test" on lower extremities will replicate scoring from the corresponding upper limb. Please, make sure you grade the upper limb before clicking "Unable to test".*



# Panel 13: Sensory exam: Dermatome distribution

# features: 208

Max score: 156

% of NeurEx: 11.6

Normal

Abnormal: Dermatome distribution

Abnormal: Stocking-gloves distribution

Select location first, then assigned the dysfunction rating:

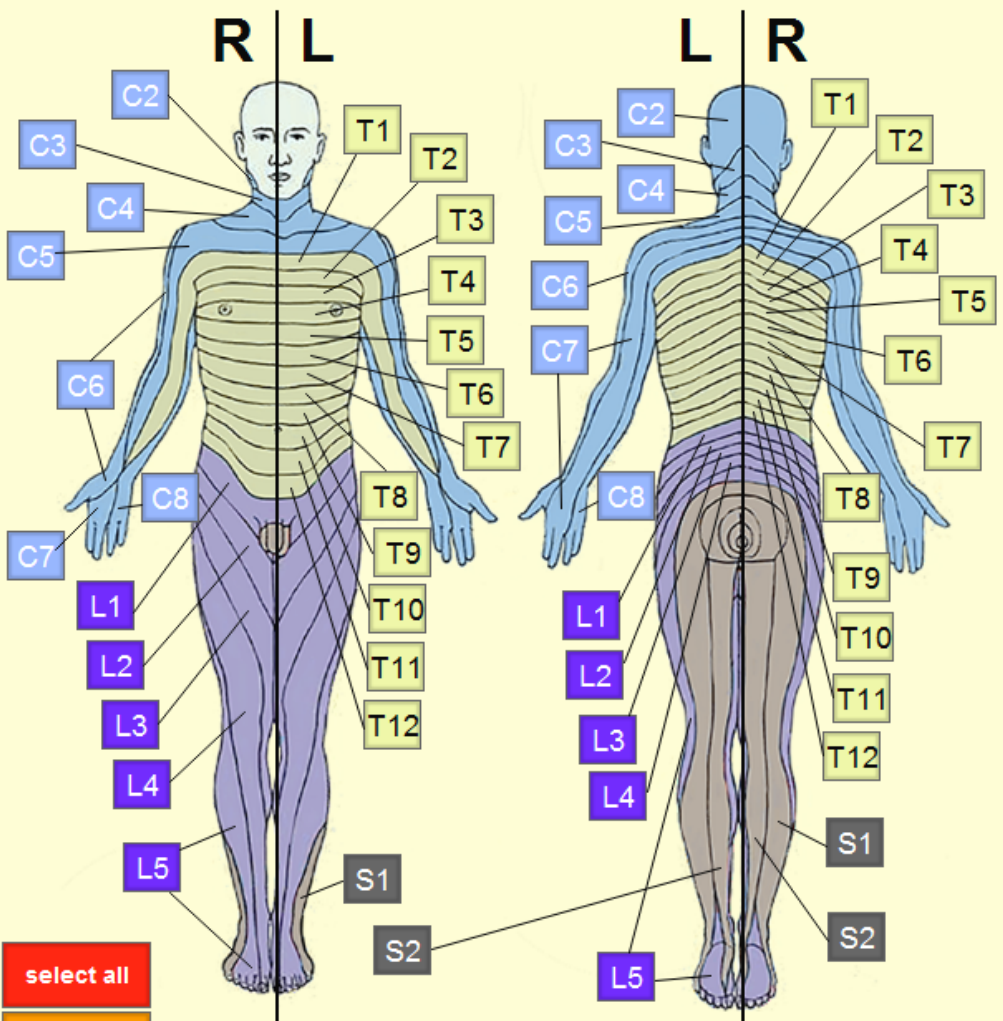

### Abnormal light touch sensation

|                              |     |    |                          |    |                          |     |
|------------------------------|-----|----|--------------------------|----|--------------------------|-----|
| Normal light touch sensation | R   | C2 | <input type="checkbox"/> | C2 | <input type="checkbox"/> | L   |
|                              |     | C3 | <input type="checkbox"/> | C3 | <input type="checkbox"/> |     |
|                              |     | C4 | <input type="checkbox"/> | C4 | <input type="checkbox"/> |     |
|                              | T1  | C5 | <input type="checkbox"/> | C5 | <input type="checkbox"/> | T1  |
|                              | T2  | C6 | <input type="checkbox"/> | C6 | <input type="checkbox"/> | T2  |
|                              | T3  | C7 | <input type="checkbox"/> | C7 | <input type="checkbox"/> | T3  |
|                              | T4  | C8 | <input type="checkbox"/> | C8 | <input type="checkbox"/> | T4  |
|                              | T5  |    |                          |    |                          | T5  |
|                              | T6  |    |                          |    |                          | T6  |
|                              | T7  |    |                          |    |                          | T7  |
|                              | T8  |    |                          |    |                          | T8  |
|                              | T9  | L1 | <input type="checkbox"/> | L1 | <input type="checkbox"/> | T9  |
|                              | T10 | L2 | <input type="checkbox"/> | L2 | <input type="checkbox"/> | T10 |
|                              | T11 | L3 | <input type="checkbox"/> | L3 | <input type="checkbox"/> | T11 |
|                              | T12 | L4 | <input type="checkbox"/> | L4 | <input type="checkbox"/> | T12 |
|                              |     | L5 | <input type="checkbox"/> | L5 | <input type="checkbox"/> |     |
|                              |     | S1 | <input type="checkbox"/> | S1 | <input type="checkbox"/> |     |
|                              |     | S2 | <input type="checkbox"/> | S2 | <input type="checkbox"/> |     |

Mild

Moderate

Severe

### Abnormal pin prick sensation

|                            |     |    |                          |    |                          |     |
|----------------------------|-----|----|--------------------------|----|--------------------------|-----|
| Normal pin prick sensation | R   | C2 | <input type="checkbox"/> | C2 | <input type="checkbox"/> | L   |
|                            |     | C3 | <input type="checkbox"/> | C3 | <input type="checkbox"/> |     |
|                            |     | C4 | <input type="checkbox"/> | C4 | <input type="checkbox"/> |     |
|                            | T1  | C5 | <input type="checkbox"/> | C5 | <input type="checkbox"/> | T1  |
|                            | T2  | C6 | <input type="checkbox"/> | C6 | <input type="checkbox"/> | T2  |
|                            | T3  | C7 | <input type="checkbox"/> | C7 | <input type="checkbox"/> | T3  |
|                            | T4  | C8 | <input type="checkbox"/> | C8 | <input type="checkbox"/> | T4  |
|                            | T5  |    |                          |    |                          | T5  |
|                            | T6  |    |                          |    |                          | T6  |
|                            | T7  |    |                          |    |                          | T7  |
|                            | T8  |    |                          |    |                          | T8  |
|                            | T9  | L1 | <input type="checkbox"/> | L1 | <input type="checkbox"/> | T9  |
|                            | T10 | L2 | <input type="checkbox"/> | L2 | <input type="checkbox"/> | T10 |
|                            | T11 | L3 | <input type="checkbox"/> | L3 | <input type="checkbox"/> | T11 |
|                            | T12 | L4 | <input type="checkbox"/> | L4 | <input type="checkbox"/> | T12 |
|                            |     | L5 | <input type="checkbox"/> | L5 | <input type="checkbox"/> |     |
|                            |     | S1 | <input type="checkbox"/> | S1 | <input type="checkbox"/> |     |
|                            |     | S2 | <input type="checkbox"/> | S2 | <input type="checkbox"/> |     |

Mild

Moderate

Severe

### Abnormal temperature sensation

|                              |     |    |                          |    |                          |     |
|------------------------------|-----|----|--------------------------|----|--------------------------|-----|
| Normal temperature sensation | R   | C2 | <input type="checkbox"/> | C2 | <input type="checkbox"/> | L   |
|                              |     | C3 | <input type="checkbox"/> | C3 | <input type="checkbox"/> |     |
|                              |     | C4 | <input type="checkbox"/> | C4 | <input type="checkbox"/> |     |
|                              | T1  | C5 | <input type="checkbox"/> | C5 | <input type="checkbox"/> | T1  |
|                              | T2  | C6 | <input type="checkbox"/> | C6 | <input type="checkbox"/> | T2  |
|                              | T3  | C7 | <input type="checkbox"/> | C7 | <input type="checkbox"/> | T3  |
|                              | T4  | C8 | <input type="checkbox"/> | C8 | <input type="checkbox"/> | T4  |
|                              | T5  |    |                          |    |                          | T5  |
|                              | T6  |    |                          |    |                          | T6  |
|                              | T7  |    |                          |    |                          | T7  |
|                              | T8  |    |                          |    |                          | T8  |
|                              | T9  | L1 | <input type="checkbox"/> | L1 | <input type="checkbox"/> | T9  |
|                              | T10 | L2 | <input type="checkbox"/> | L2 | <input type="checkbox"/> | T10 |
|                              | T11 | L3 | <input type="checkbox"/> | L3 | <input type="checkbox"/> | T11 |
|                              | T12 | L4 | <input type="checkbox"/> | L4 | <input type="checkbox"/> | T12 |
|                              |     | L5 | <input type="checkbox"/> | L5 | <input type="checkbox"/> |     |
|                              |     | S1 | <input type="checkbox"/> | S1 | <input type="checkbox"/> |     |
|                              |     | S2 | <input type="checkbox"/> | S2 | <input type="checkbox"/> |     |

Mild

Moderate

Severe

### Abnormal proprioception

|                       |     |    |                          |    |                          |     |
|-----------------------|-----|----|--------------------------|----|--------------------------|-----|
| Normal proprioception | R   | C2 | <input type="checkbox"/> | C2 | <input type="checkbox"/> | L   |
|                       |     | C3 | <input type="checkbox"/> | C3 | <input type="checkbox"/> |     |
|                       |     | C4 | <input type="checkbox"/> | C4 | <input type="checkbox"/> |     |
|                       | T1  | C5 | <input type="checkbox"/> | C5 | <input type="checkbox"/> | T1  |
|                       | T2  | C6 | <input type="checkbox"/> | C6 | <input type="checkbox"/> | T2  |
|                       | T3  | C7 | <input type="checkbox"/> | C7 | <input type="checkbox"/> | T3  |
|                       | T4  | C8 | <input type="checkbox"/> | C8 | <input type="checkbox"/> | T4  |
|                       | T5  |    |                          |    |                          | T5  |
|                       | T6  |    |                          |    |                          | T6  |
|                       | T7  |    |                          |    |                          | T7  |
|                       | T8  |    |                          |    |                          | T8  |
|                       | T9  | L1 | <input type="checkbox"/> | L1 | <input type="checkbox"/> | T9  |
|                       | T10 | L2 | <input type="checkbox"/> | L2 | <input type="checkbox"/> | T10 |
|                       | T11 | L3 | <input type="checkbox"/> | L3 | <input type="checkbox"/> | T11 |
|                       | T12 | L4 | <input type="checkbox"/> | L4 | <input type="checkbox"/> | T12 |
|                       |     | L5 | <input type="checkbox"/> | L5 | <input type="checkbox"/> |     |
|                       |     | S1 | <input type="checkbox"/> | S1 | <input type="checkbox"/> |     |
|                       |     | S2 | <input type="checkbox"/> | S2 | <input type="checkbox"/> |     |

Mild

Moderate

Severe

# Panel 13: Sensory exam: Stocking-glove distribution

# features: **72**

Max score: **156**

% of NeurEx: **11.6**

Normal

Abnormal: Dermatome distribution

Abnormal: Stocking-gloves distribution

Select location first, then assigned the dysfunction rating:

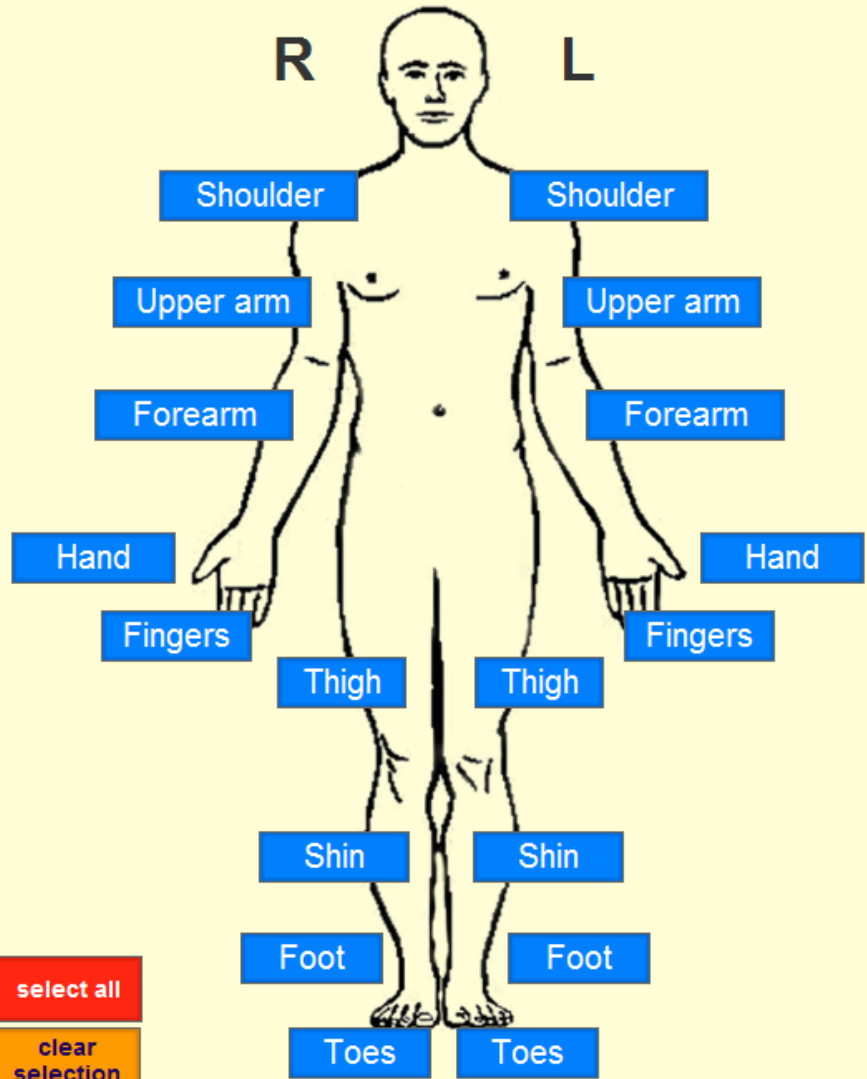

select all

clear selection

Abnormal light touch sensation

Normal light touch sensation

Mild

Moderate

Severe

Abnormal pin prick sensation

Normal pin prick sensation

Mild

Moderate

Severe

Abnormal temperature sensation

Normal temperature sensation

Mild

Moderate

Severe

Abnormal proprioception

Normal proprioception

Mild

Moderate

Severe

# Panel 14: Sensory exam: Pains/Paresthesias

# features: **56**

Max score: **152**

% of NeurEx: **11.3**

Abnormal sensation:

- Paresthesias
- Pains

Vibration sense: quantitative 128 Hz (sec)

|          | R  | L  |
|----------|----|----|
| Fingers: | 25 | 25 |
| Wrists:  | 25 | 25 |
| Toes:    | 15 | 15 |
| Knees:   | 15 | 15 |

Select location first, then assigned the dysfunction rating:

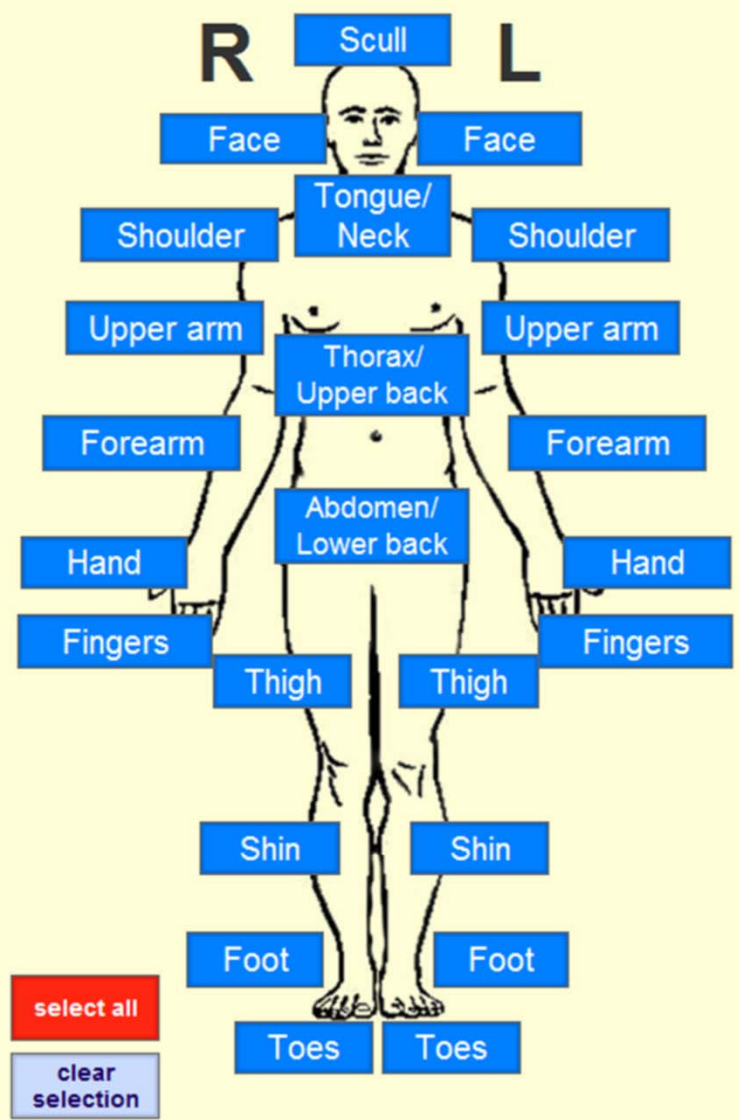

Paresthesias rating:

- No dysfunction
- Mild
- Moderate
- Severe

Pains rating:

- No dysfunction
- Mild
- Moderate
- Severe

# Panel 15: Positive phenomena

# features: 36

Max score: 216

% of NeurEx: 16.0

Select abnormalities and location first, then assigned dysfunction rating:

**Abnormal movements:**

- L'hermittes sign
- Flexor/Extensor spasms
- Resting tremor
- Choreiform/Athetoid movements
- Tics
- Hemibalismus
- Myoclonus
- Seizures
- Dystonia

**Abnormal signs:**

- Myotonia
- Tetany
- Fibrillations/Fasciculations

**Dysfunction rating**

|                                |          |
|--------------------------------|----------|
| No abnormal positive phenomena | Mild     |
|                                | Moderate |
|                                | Severe   |

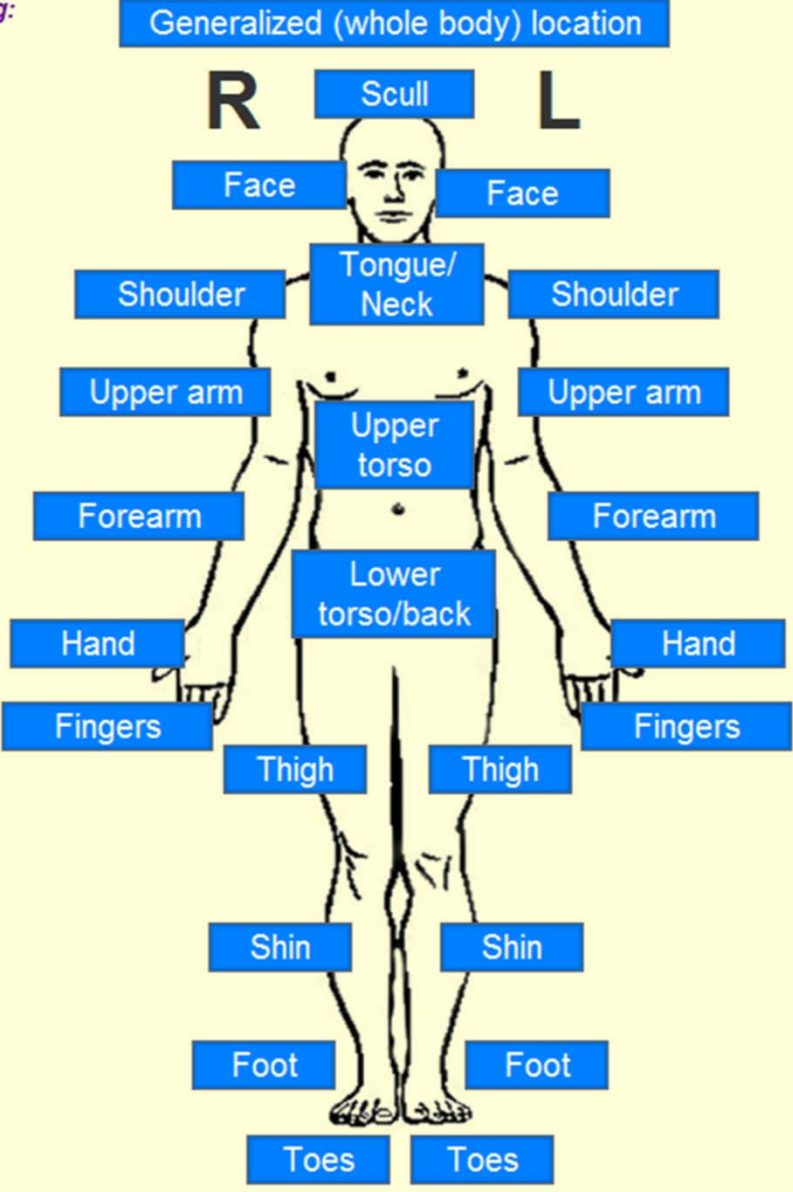

clear selection



# Panel 16: Stance & Gait

# features: 16

Max score: 59

% of NeurEx: 4.4

Select dysfunction(s) first, then assigned dysfunction rating:

|                                         |                     |          |
|-----------------------------------------|---------------------|----------|
| Cerebellar gait: wide-based, high steps | Dysfunction rating: | Normal   |
| Sensory ataxia                          |                     | Mild     |
| Spastic gait                            |                     | Moderate |
|                                         |                     | Severe   |

Tandem gait step-outs (out of 10 steps):

0 1 2 3 4 5 6 7 8 9 10 Unable

Positive Romberg sign

Standing/Transfer:

Able

Unable

Jumping:

Each leg independently

R-leg only

L-leg only

Legs together only

With support only

Unable to jump

Falls:

None

Few per year

Few per month

Few per week

Few per day

No injury

With injury

Walking distance:

> 5 miles

1-5 miles

> 500 meters

> 300 meters

> 200 meters

> 100 meters

< 100 meters

< 5 steps

Unable to walk

Assisting device:

No AFO or Bioness

1 AFO or Bioness

Bilateral AFO or Bioness

No other assisting device

Cane/unilateral support

Walker/bilater support

Wheelchair/Scooter

Bed/Unable to sit unsupported

Running:

Normal

Slow/fatigued

Unable to run

Climbing stairs:

Normal

With support only

Unable

Walking on heels:

Able

Unable

Walking on toes:

Able

Unable



# Panel 17: Bowel, Bladder, Sexual and Autonomic Functions

# features: **24**

Max score: **87**

% of NeurEx: **6.4**

*Select dysfunction(s) first, then assigned dysfunction rating:*

| Bladder abnormalities:  |                      | Dysfunction rating       |
|-------------------------|----------------------|--------------------------|
| Frequency               |                      | No bladder abnormalities |
| Urgency                 |                      |                          |
| Hesitancy               |                      | Mild                     |
| Incomplete emptying     |                      | Moderate                 |
| Occasional incontinence |                      | Severe                   |
| Permanent incontinence  | Self-catheterization | Idwelling catheter       |

*Select dysfunction(s) first, then assigned dysfunction rating:*

| Bowel abnormalities:                             |  | Dysfunction rating     |
|--------------------------------------------------|--|------------------------|
| Urgency                                          |  | No bowel abnormalities |
| Constipation                                     |  |                        |
| Diarrhea                                         |  | Mild                   |
| Occasional incontinence                          |  | Moderate               |
|                                                  |  | Severe                 |
| Permanent incontinence/ Inability to move bowels |  |                        |

*Select dysfunction(s) first, then assigned dysfunction rating:*

| Sexual abnormalities:     |  | Dysfunction rating      |
|---------------------------|--|-------------------------|
| Lack of libido            |  | No sexual abnormalities |
| Problems with sensation   |  |                         |
| Problems with arousal     |  | Mild                    |
| Problems with erection    |  | Moderate                |
| Problems with erection    |  | Severe                  |
| Problems with ejaculation |  |                         |
| Problems with lubrication |  |                         |
| Problems with orgasm      |  |                         |

*Select dysfunction(s) first, then assigned dysfunction rating:*

| Autonomic abnormalities:  |  | Dysfunction rating         |
|---------------------------|--|----------------------------|
| Problems with sweating    |  | No autonomic abnormalities |
| Orthostatic hypotension   |  |                            |
| Fainting                  |  | Mild                       |
|                           |  | Moderate                   |
| Edema and trophic changes |  | Severe                     |

# Panel 18: Summary

## Kurtzke Functional Systems Scores (FSS)

|                                |          |
|--------------------------------|----------|
| Pyramidal Functions            | 0        |
| Cerebellar Functions           | 0        |
| Brainstem Functions            | 0        |
| Sensory Function               | 0        |
| Bowel and Bladder Function     | 0        |
| Visual Function                | 0        |
| Cerebral (or Mental) Functions | 0        |
| <b>EDSS</b>                    | <b>0</b> |

## The IPEC Disability Scale

|                                         |          |
|-----------------------------------------|----------|
| Motor Score: Gait                       | 0        |
| Motor Score: Running                    | 0        |
| Motor Score: Climbing Stairs            | 0        |
| Motor Score: Jumping                    | 0        |
| Spasticity Score: Clonus                | 0        |
| Spasticity Score: Flexor/Extensor Spasm | 0        |
| Sensory Score: Paresthesias             | 0        |
| Lumbar and/or Lower Limb Pain           | 0        |
| Sphincter Score: Bladder Control        | 0        |
| Sphincter Score: Bowel Continence       | 0        |
| <b>IPEC</b>                             | <b>0</b> |

**Hauser Ambulation Index 0**

## Scripps Neurological Rating Scale

|                                      |    |        |
|--------------------------------------|----|--------|
| Mentation and Mood                   | 10 | Normal |
| Cranial Nerves: Visual Acuity        | 5  | Normal |
| Cranial Nerves: Fields, Disc, Pupils | 6  | Normal |
| Cranial Nerves: Eye Movements        | 5  | Normal |
| Cranial Nerves: Nystagmus            | 5  | Normal |
| Lower Cranial Nerves                 | 5  | Normal |
| Motor: RU                            | 5  | Normal |
| Motor: LU                            | 5  | Normal |
| Motor: RL                            | 5  | Normal |
| Motor: LL                            | 5  | Normal |
| DTRs: UE                             | 4  | Normal |
| DTRs: LE                             | 4  | Normal |
| Babinsky: R; L (2 each)              | 4  | Normal |
| Sensory: RU                          | 3  | Normal |
| Sensory: LU                          | 3  | Normal |
| Sensory: RL                          | 3  | Normal |
| Sensory: LL                          | 3  | Normal |
| Cerebellar: UE                       | 5  | Normal |
| Cerebellar: LE                       | 5  | Normal |
| Gait; Trunk and Balance              | 10 | Normal |
| Bladder/Bowel/Sexual Dysfunction     | 0  | Normal |

**Scripps NRS 100**

|          |    |                                       |
|----------|----|---------------------------------------|
| 0.0/120  | 0% | 1. Cognitive functions                |
| 0.0/30   | 0% | 2. Eyes                               |
| 0.0/30   | 0% | 3. Eye movements                      |
| 0.0/24   | 0% | 4. Visual fields                      |
| 0.0/38   | 0% | 5. Brainstem/Remaining cran nerves    |
| 0.0/24   | 0% | 6. Brainstem/Lower cran nerves        |
| 0.0/28   | 0% | 7. Pyramidal signs & Motor fatigue    |
| 0.0/100  | 0% | 8. Upper extremities strength         |
| 0.0/112  | 0% | 9. Lower extremities strength         |
| 0.0/41   | 0% | 10. Reflexes                          |
| 0.0/72   | 0% | 11. Muscle atrophy                    |
| 0.0/60   | 0% | 12. Cerebellar functions              |
| 0.0/156  | 0% | 13. Sensory exam: dermatome/S-G       |
| 0.0/152  | 0% | 14. Sensory exam: pains, paresthesias |
| 0.0/216  | 0% | 15. Positive phenomena                |
| 0.0/59   | 0% | 16. Stance & Gait                     |
| 0.0/87   | 0% | 17. Bowel, Bladder, Sexual functions  |
| 0.0/1349 | 0% | <b>NeurEx total</b>                   |

**Figure S2**

**A**

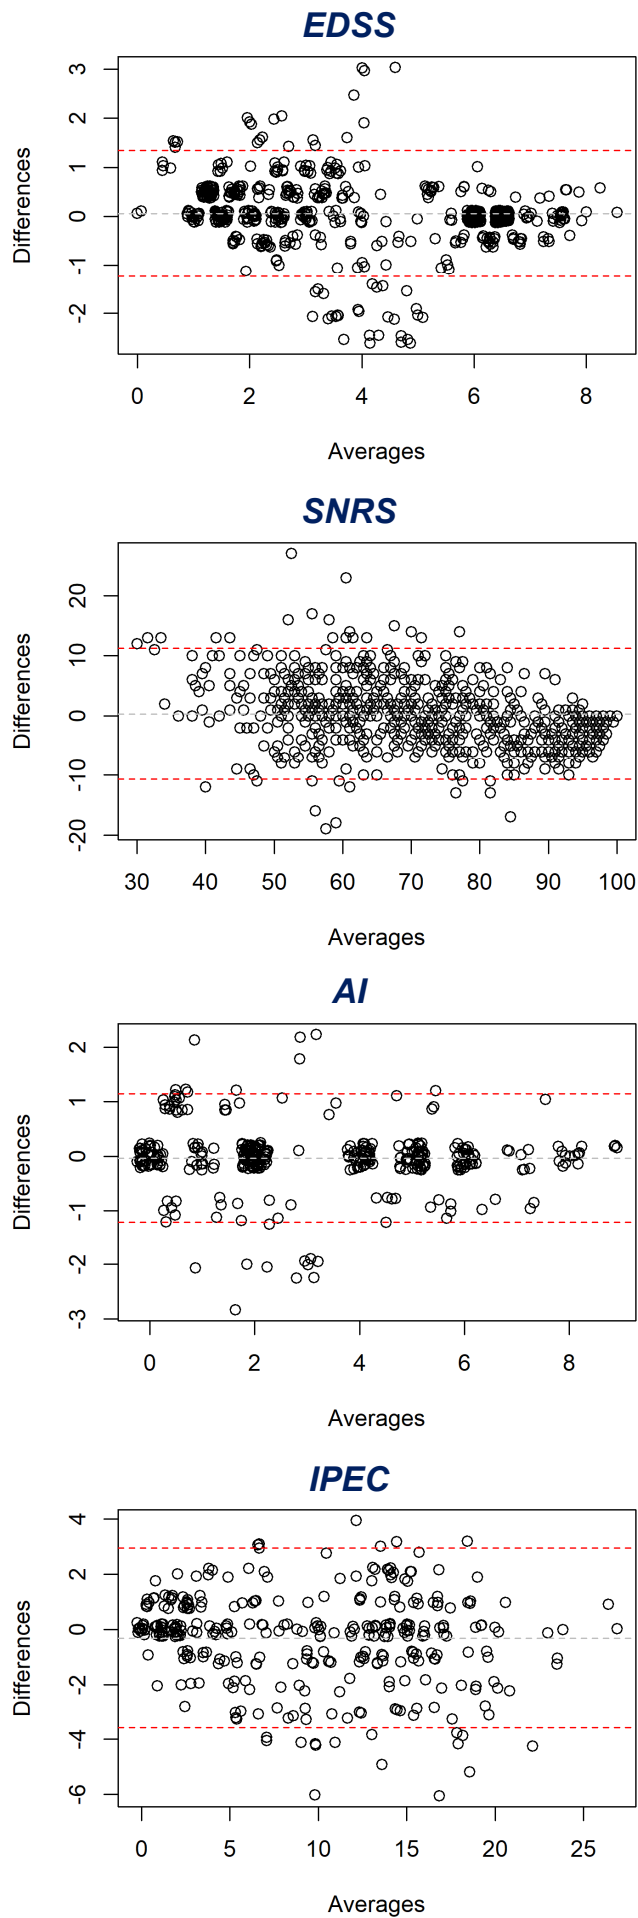

**B**

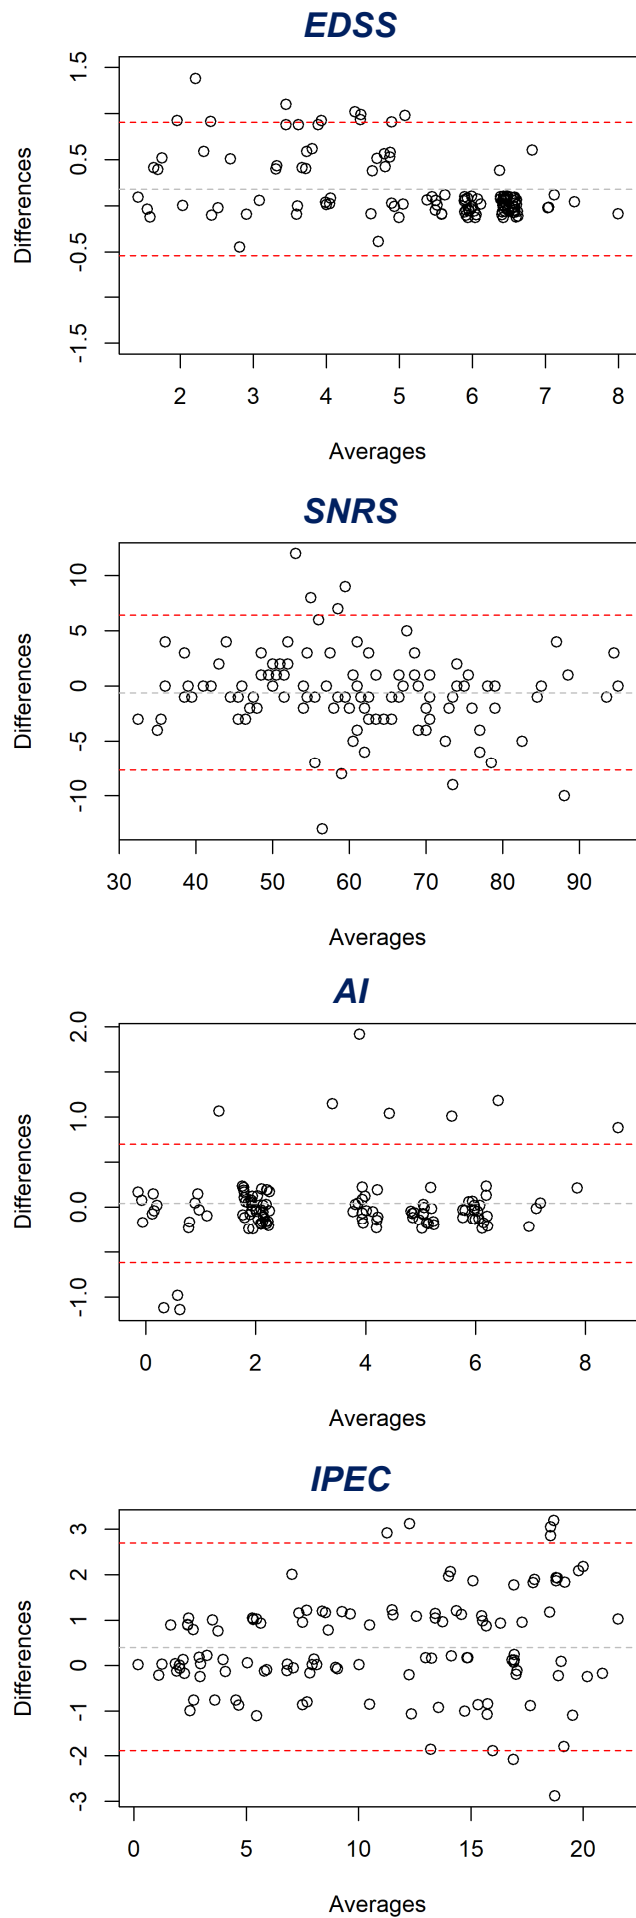

**Table S1: Demographic data**

| <b>diagnosis</b>        | <i>RR-MS</i> | <i>PP-MS</i> | <i>SP-MS</i> | <i>CIS/RIS</i> |
|-------------------------|--------------|--------------|--------------|----------------|
| <b>N (F/M)</b>          | 48/40        | 50/58        | 55/6         | 3/2            |
| <b>Age</b>              |              |              |              |                |
| mean                    | 40.1         | 54.8         | 52.9         | 44.1           |
| SD                      | 10.3         | 8.6          | 10           | 10             |
| range                   | 18.3 - 67.9  | 25.3 - 74.7  | 22 - 70      | 26.8 - 52.6    |
| <b>Disease Duration</b> |              |              |              |                |
| mean                    | 5.9          | 11.6         | 21.2         | 0.7            |
| SD                      | 7.8          | 8.1          | 9.8          | 0.8            |
| range                   | 0 - 36.2     | 0.2 - 38.7   | 1.4 - 42.3   | 0.1 - 1.9      |
| <b>EDSS</b>             |              |              |              |                |
| mean                    | 2            | 5.1          | 5.7          | 1.9            |
| SD                      | 1.3          | 1.7          | 1.3          | 1.2            |
| range                   | 0 - 6        | 1.5 - 8      | 1.5 - 7.5    | 0 - 3          |
| <b>SNRS</b>             |              |              |              |                |
| mean                    | 89           | 68           | 62           | 88             |
| SD                      | 10           | 13           | 11           | 8              |
| range                   | 54 - 100     | 27 - 98      | 36 - 87      | 80 - 100       |

SD = standard deviation
